# Supplementary material for: Satellite-derived emissions of carbon monoxide, ammonia, and nitrogen dioxide from the 2016 Horse River wildfire in the Fort McMurray area
Source: Copernicus journal article supplement (doi:10.5194/acp-2018-913), 2018-10-12
Supplement: Supplementary file 1 [file MAML_HorseRiverWildfire_2016_HourlyAverages.xlsx]

## Sheet: Readme
Data collected by Marty Collins, Shane Taylor, and Charlene Puttick at Alberta Environment and Parks (AEP) with Mobile Air Monitoring Laboratory (MAML) as part of emergency response monitoring during the 2016 Horse River wildfire
Contact: AEP EMSD Airshed Sciences <AEP.EMSD-AirshedSciences@gov.ab.ca>
The MAML is a 27-foot vehicle equipped with continuous air quality analyzers
Data presented are hourly average measurements, for hours with >= 45 minutes of valid data
Parameter	Analyzer	Detection Limit
WSP	Climatronics AIO weather station model 102780	--
WDR	Climatronics AIO weather station model 102780	--
CO	Thermo 48i-TLE (trace-level) continuous gas analyzer	0.1 ppm
SO2	Thermo Scientific Model 43i continuous gas analyzer	1 ppb
H2S	Thermo 450i continuous gas analyzer	1 ppb
TRS	Thermo 43i continuous gas analyzer	1 ppb
NO	Thermo 17i continuous gas analyzer	1 ppb
NO2	Thermo 17i continuous gas analyzer	1 ppb
NOx	Thermo 17i continuous gas analyzer	1 ppb
NH3	Thermo 17i continuous gas analyzer	1 ppb
O3	Thermo 49i continuous gas analyzer	1 ppb
PAH	Echochem PAS 2000	3 ng/m3
CH4	Thermo 55c continuous gas analyzer	20 ppb
NMHC	Thermo 55c continuous gas analyzer	50 ppb
THC	Thermo 55c continuous gas analyzer	50 ppb
PM10	Grimm aerosol model 180	0.1 ug/m3
PM2.5	Grimm aerosol model 180	0.1 ug/m3
PM1	Grimm aerosol model 180	0.1 ug/m3

## Sheet: Data
Site Name	Date (MST)	Time (MST)	Longitude	Latitude	WSP	WDR	CO	SO2	H2S	TRS	NO	NO2	NOx	NH3	O3	PAH	CH4	NMHC	THC	PM10	PM2.5	PM1
		Hours	Deg	Deg	kph	Deg	ppb	ppb	ppb	ppb	ppb	ppb	ppb	ppb	ppb	ngr/m3	ppm	ppm	ppm	ug/m3(L)	ug/m3(L)	ug/m3(L)
Gregoire	2016-05-16	13	-111.345	56.6748	21.1083	182.132	806.667	1.86667	0.633333	0.6	2.955	6.32167	9.34833	38.25	67.6667	11.36	2.035	0.14	2.17667	163	104.572	93.6817
Gregoire	2016-05-16	14	-111.345	56.6748	20.2117	192.928	1026.67	2.45	0.9	0.85	2.725	6.99	9.775	57.0833	67.6167	12.1967	2.04	0.196667	2.23333	151.7	114.072	102.208
Gregoire	2016-05-16	15	-111.345	56.6748	23.4017	199.782	696.667	1.28333	0.566667	0.4	1.50667	5.13833	6.70167	41.4333	65.75	7.74833	2.00167	0.125	2.135	113.017	75.38	65.875
Gregoire	2016-05-16	16	-111.345	56.6748	23.0483	198.218	623.333	0.8	0.533333	0.3	0.998333	4.15833	5.20833	38.7	63.9333	6.37167	2.005	0.108333	2.12167	99.2833	68.5817	60.1717
Beacon Hill	2016-05-17	8	-111.358	56.6917	12.5217	249.002	1676.67	0.766667	0.416667	1	3.00167	1.36833	6.86833	133.333	49.4	6.585	2	0.293333	2.30667	173.767	142.42	117.563
Beacon Hill	2016-05-17	9	-111.358	56.6917	13.1	249.592	1693.33	1.23333	0.3	1.01667	1.31	3.62	7.08167	120.783	55.1333	7.195	2.01833	0.298333	2.32	190.217	156.022	134.333
Beacon Hill	2016-05-17	10	-111.358	56.6917	14.61	249.338	1283.33	0.95	0.216667	1	0.981667	2.66833	5.45167	96.9667	53.8	5.405	2	0.213333	2.24833	146.817	126.685	111.715
Beacon Hill	2016-05-17	11	-111.358	56.6917	14.7467	245.555	968.333	0.8	0.0666667	0.95	0.505	2.62	4.57667	76.0833	58.1333	4.43167	2	0.196667	2.18167	114.7	98.77	88.61
Urgent Care	2016-05-17	12	-111.347	56.7124	13.385	266.005	1016.67	1.16667	0.05	0.5	0.541667	5.035	6.49	48.35	67.7667	4.71667	2.01	0.19	2.19167	125.233	101.652	91.0033
Urgent Care	2016-05-17	13	-111.347	56.7124	13.125	268.965	1101.67	1.8	0.183333	0.716667	1.84667	8.28	10.6833	45.1667	61.8167	7.495	2.16	0.2	2.36167	136.217	110.355	98.74
Urgent Care	2016-05-17	14	-111.347	56.7124	11.7833	268.055	1040	1.13333	0.133333	0.816667	1.25833	5.83833	7.315	43.65	54.75	6.79833	2.00667	0.2	2.20333	126.783	102.348	90.1517
Urgent Care	2016-05-17	15	-111.347	56.7124	7.015	281.573	1146.67	1.16667	0.183333	0.866667	1.47333	6.14333	7.47333	48.2	52.5333	7.00833	2	0.2	2.2	130.383	106.633	93.7317
Abasand	2016-05-18	8	-111.376	56.7112	9.32	203.402	1640	0.833333	0.2	0.983333	0.111667	6.08333	5.18	140.5	40.4	10.9267	2.05667	0.333333	2.395	194.883	164.982	143.017
Abasand	2016-05-18	9	-111.376	56.7112	10.57	215.965	3320	1.8	0.55	0.766667	0.595	9.34833	10.0717	228.617	53.3167	20.7567	2.21167	0.563333	2.77333	317.167	276.835	238.998
Abasand	2016-05-18	10	-111.376	56.7112	13.065	229.702	2711.67	1.43333	0.283333	0.733333	1.42833	6.725	8.22	201.133	51.7667	15.4417	2.13333	0.45	2.60167	240.733	206.878	181.353
Abasand	2016-05-18	11	-111.376	56.7112	14.745	231.993	1550	1.01667	0.0666667	1	0.815	5.175	5.93333	104.083	50.5167	7.70333	2.01667	0.23	2.25333	137.3	111.65	98.7317
Ecole McTavish	2016-05-18	13	-111.455	56.7616	18.0767	231.288	306.667	0.35	0.0333333	0.7	0.00166667	1.87667	0.985	15.2167	47.4	2.63	1.9	0.0633333	1.97833	37.05	27.0117	24.135
Ecole McTavish	2016-05-18	14	-111.455	56.7616	14.9583	233.48	366.667	0.9	0.05	0.216667	0.0666667	2.74167	2.25833	16.3167	48.5667	3.30833	1.9	0.0916667	1.99667	48.9	42.09	38.7917
Grayling Terrace	2016-05-19	9	-111.361	56.7081	16.0183	310.202	316.667	0	0	0.433333	0	1.85333	0	23.3833	27.1833	3.68333	2	0.0983333	2.08167	47.0667	31.495	26.1733
Grayling Terrace	2016-05-19	10	-111.361	56.7081	15.8667	308.19	231.667	0	0	0	0	1.22	0	15.9667	24.6	3.22833	2	0.06	2.01833	29.1167	17.89	14.6983
Grayling Terrace	2016-05-19	11	-111.361	56.7081	16.9083	309.142	190	0	0	0	0	1.19667	0	15.05	22.1667	3.27333	2	0.0716667	2.04167	18.7333	11.3533	7.33167
Grayling Terrace	2016-05-19	12	-111.361	56.7081	15.225	310.737	196.667	0	0	0	0	1.115	0	13.5167	21.95	3.19	2	0.06	2.02	23.55	12.1283	7.90333
Wood Buffalo	2016-05-19	13	-111.464	56.7212	24.385	247.207	381.667	0	0	0	0	0.41	0	19.2833	23.8333	5.02167	2	0.101667	2.09167	26.65	24.4033	19.9367
Wood Buffalo	2016-05-19	14	-111.464	56.7212	25.4517	205.585	413.333	0	0	0.0333333	0	0.523333	0	30.1	22.6667	5.72167	2	0.101667	2.1	30.4667	28.2583	23.175
Wood Buffalo	2016-05-19	15	-111.464	56.7213	23.1817	182.177	326.667	0	0	0	0	0.5	0	28.0167	22.0833	4.47833	2	0.0933333	2.08	21.5167	19.5517	15.9633
Wood Buffalo	2016-05-19	16	-111.464	56.7213	22.5633	291.39	448.333	0	0	0.1	0	0.663333	0	34.7	22.4667	4.82333	2	0.101667	2.09667	33.65	29.7383	23.6917
Downtown Hospital	2016-05-20	13	-111.36	56.7175	8.40833	73.0733	1103.33	1.38333	0.0166667	0	0.0716667	7.56167	7.50667	29.3	66	7.39	2	0.168333	2.19167	237.8	220.928	208.775
Downtown Hospital	2016-05-20	14	-111.36	56.7175	8.06	126.448	1480	2.36667	0.0833333	0	0.68	10.345	11.1967	37.05	67.4667	9.67667	2.04	0.22	2.26833	253.833	233.062	217.313
Downtown Hospital	2016-05-20	15	-111.36	56.7175	8.44167	138.185	850	2.06667	0.05	0	2.11167	10.1683	12.3517	42.3667	57.7167	8.48667	2.07667	0.225	2.285	216.967	195.645	181.257
Downtown Hospital	2016-05-20	16	-111.36	56.7177	6.56833	121.655	1005	1.95	0.15	0	0.745	7.48667	8.57333	46.0333	55.0333	6.13667	2.00833	0.216667	2.22833	219.117	193.608	179.495
Waterways	2016-05-20	9	-111.34	56.6994	11.9817	54.275	371.667	0	0.533333	0.35	0	0.541667	0.00333333	19.4	28.65	2.61667	2	0.0683333	2.02167	40.3167	35.4867	31.25
Waterways	2016-05-20	10	-111.34	56.6994	11.0633	71.2733	660	0.0166667	0.0833333	0	0.0216667	1.15167	0.383333	24.6	32.1	2.62167	2.00833	0.0783333	2.06	57.5167	48.9367	43.585
Waterways	2016-05-20	11	-111.34	56.6994	13.2017	68.6217	491.667	0.166667	0.0833333	0	0.01	1.61	0.608333	20.7833	36.55	3.30667	1.96667	0.0883333	2.01	82.4833	73.9	67.3517
Waterways	2016-05-20	12	-111.34	56.6994	11.62	76.3817	550	0.7	0.0166667	0	0.15	2.67	1.905	22.2	46.8667	3.605	2	0.0983333	2.08	112.183	102.443	95.3133
REOC	2016-05-21	8	-111.33	56.6573	17.9667	290.362	593.333	0	0	0.8	0	3.73667	0.161667	54.5667	16.4	4.47833	2.035	0.2	2.23667	84.8167	72.0767	55.95
REOC	2016-05-21	9	-111.33	56.6573	16.8033	302.085	621.667	0	0	0.483333	0	4.61667	1.17667	56.8833	21.0167	7.20833	2.02667	0.2	2.22	82.1833	72.8467	60.68
REOC	2016-05-21	10	-111.33	56.6573	17.8283	313.262	626.667	0	0	0.55	0	3.96167	0.633333	59.9833	23.75	5.55833	2.03	0.2	2.20833	87.8167	79.015	68.1317
Saprae Creek	2016-05-21	12	-111.149	56.6507	13.5183	252.582	340	0	0.0333333	0.183333	0	2.41	0	41.1667	26	2.505	2	0.146667	2.16	43.05	38.7233	34.7417
Saprae Creek	2016-05-21	13	-111.15	56.6507	13.8917	259.748	291.667	0	0.0333333	0.0666667	0	2.10333	0	36.8167	25.4833	2.27	2	0.106667	2.11167	32.65	28.9	26.155
Saprae Creek	2016-05-21	14	-111.15	56.6507	13.0867	266.797	251.667	0	0	0.116667	0	1.88333	0.0316667	30.9333	23.7167	2.25333	1.98833	0.101667	2.09	25.2167	20.095	17.94
Saprae Creek	2016-05-21	15	-111.15	56.6507	12.425	271.052	200	0	0.0166667	0.0333333	0.0116667	1.81167	0.541667	24.85	21.25	1.95	1.97333	0.09	2.04167	17.0833	12.2467	10.8617
Downtown Provincial Building	2016-05-22	11	-111.383	56.7279	17.42	316.37	183.333	0	0	0	0.346667	1.18833	1.47667	6.71667	28.0833	2.70833	1.90667	0.00833333	1.97833	7.66667	5.39333	4.535
Downtown Provincial Building	2016-05-22	12	-111.383	56.7279	18.9133	321.633	175	0	0.0666667	0	0.355	1.04333	1.32333	6.46667	29.45	2.975	1.90667	0.0183333	1.97333	11.7	6.27	4.75
Thickwood	2016-05-22	7	-111.419	56.7315	22.1517	321.033	101.667	0	0.683333	0.0833333	0	1.00667	0.295	13.9667	30.05	1.785	1.90167	0.0233333	1.97833	5.53333	5.36833	4.99167
Thickwood	2016-05-22	8	-111.419	56.7315	22.0167	331.587	150	0	0.3	0	0	0.608333	0.21	9.28333	28.95	1.71	1.9	0.0133333	1.965	5.55	5.22	4.79667
Thickwood	2016-05-22	9	-111.419	56.7315	21.51	331.165	166.667	0	0.0833333	0	0	0.548333	0.01	7.03333	29.05	1.63167	1.9	0.005	1.93833	5.38333	5.08333	4.64333
Hardin St.	2016-05-31	11	-111.375	56.7293	6.895	143.663	261.667	0	0	0.75	1.19667	1.61833	2.885	12.1	30.7333	2.38	1.925	0.0866667	2.01	4.8	2.525	1.89833
Hardin St.	2016-05-31	12	-111.375	56.7293	5.715	144.115	225	0	0	0.116667	2.14667	1.01167	3.48	12.5333	31.3667	2.23333	1.91833	0.0816667	2.01167	3.76667	1.98833	1.45333
Urgent Care	2016-05-31	14	-111.346	56.7134	7.895	192.273	176.667	0	0	0.0333333	2.56	1.52667	4.69167	11.1833	29.9	2.20833	1.91167	0.055	1.99667	4.73333	1.83167	1.20333
Urgent Care	2016-05-31	15	-111.346	56.7134	7.73833	262.158	151.667	0	0	0.0166667	0.736667	0.438333	1.48333	7.56667	29.1833	2.01667	1.91	0.02	1.98667	3.36667	1.29833	0.791667
Ecole McTavish	2016-06-01	13	-111.452	56.7616	6.745	138.752	213.333	0.05	0	0.0166667	3.51	1.255	4.74333	12.35	40.1667	1.865	1.905	0.0183333	1.93	8	3.73	2.76667
Ecole McTavish	2016-06-01	14	-111.452	56.7616	16.2067	200.9	415	0	0	0.0166667	5.18167	3.69333	8.97333	11.9667	35.5333	2.35333	1.90667	0.0733333	1.99	5.5	3.43333	2.44
Ecole McTavish	2016-06-01	15	-111.452	56.7615	7.575	171.728	445	0	0	0.0333333	4.38333	6.15833	9.75333	11.35	33.7167	3.52333	1.915	0.085	2.015	4.33333	3.29167	2.56333
Karl A Clark	2016-06-01	8	-111.358	56.7174	9.805	115.7	496.667	0	0	1.03333	0.316667	3.03333	3.33333	34.6833	13.4	3.26167	2	0.193333	2.19333	42.6167	33.5717	28.2783
Karl A Clark	2016-06-01	9	-111.358	56.7175	3.115	200.727	423.333	0.05	0	0.65	2.90833	3.69167	4.83167	35.3667	16.5667	6.65833	1.97167	0.141667	2.115	36.7333	25.2617	20.845
Karl A Clark	2016-06-01	10	-111.358	56.7175	5.02333	114.312	383.333	0.166667	0	0.116667	2.74333	3.57833	6.44833	28.0833	24.95	6.345	1.98833	0.085	2.07667	27.1167	14.22	10.6133
Karl A Clark	2016-06-01	11	-111.358	56.7175	5.825	71.555	125	0.4	0	0	4.73333	4.88167	9.66167	18.65	34.7167	14.6767	1.93	0.02	1.97833	14.55	5.74333	4.13167
Parsons	2016-06-02	8	-111.45	56.7772	5.56833	131.988	441.667	0	0	0.883333	0.28	3.095	2.475	16.1	25.6333	3.32833	2.01	0.13	2.13333	17.9833	12.1933	10.5267
Parsons	2016-06-02	9	-111.45	56.777	6.64833	157.218	348.333	0	0	0.133333	0.35	2.05333	1.14	13.6167	35.5667	2.04	1.935	0.105	2.05167	14.5833	6.89	5.64167
Parsons	2016-06-02	10	-111.451	56.7766	6.81333	148.175	90	0.0166667	0	0.0333333	0	1.385	0.03	12.25	41.9333	1.97333	1.90333	0.0516667	1.94667	5.93333	3.475	2.68667
Parsons	2016-06-02	11	-111.451	56.7766	7.54833	156.58	176.667	0	0	0	0.035	1.30333	0.173333	9.45	43.1167	1.76	1.9	0.0333333	1.92333	4.13333	2.49667	1.92167
Thickwood	2016-06-02	13	-111.419	56.7315	7.01	83.6	191.667	0.0166667	0	0	0.00166667	0.145	0	7.93333	41.2167	1.98333	1.905	0.0316667	1.93167	5.08333	3.03333	2.4
Thickwood	2016-06-02	14	-111.419	56.7315	6.31333	158.51	243.333	0	0	0	0.0816667	0.883333	0.551667	7.66667	39.4333	1.98167	1.90333	0.06	1.95333	5.58333	3.56167	2.905
Thickwood	2016-06-02	15	-111.419	56.7315	5.86167	236.96	501.667	0	0	0	3.5	0.211667	4.29167	8.55	39.6667	2.16667	1.90333	0.08	1.965	11.45	3.75333	1.96833
Gregoire	2016-06-03	12	-111.343	56.6747	18.4067	234.502	81.6667	0	0	0.166667	2.12167	1.50833	3.51167	8.1	38.2	2.86	1.9	0.0433333	1.91667	11.0333	2.19833	0.813333
Gregoire	2016-06-03	13	-111.343	56.6747	18.3833	249.225	93.3333	0	0	0	0.841667	1.01167	1.78667	7.25	38.9	2.66667	1.9	0.0566667	1.94	7.06667	1.67667	0.621667
Gregoire	2016-06-03	14	-111.343	56.6747	19.8067	245.748	106.667	0	0	0	0.21	0.91	0.956667	6.15	40.3167	2.38167	1.86833	0.045	1.9	6.8	1.595	0.576667
Gregoire	2016-06-03	15	-111.343	56.6747	20.285	243.937	133.333	0	0	0	0.145	1.205	1.21833	5.8	41.1667	2.675	1.9	0.035	1.92167	7.5	1.675	0.58
Wood Buffalo	2016-06-03	8	-111.464	56.721	11.2817	234.635	81.6667	0	0	0.283333	0	0.665	0.01	12.0833	21.0833	1.77667	1.90667	0.0866667	2	8.58333	4.975	3.79333
Wood Buffalo	2016-06-03	9	-111.464	56.721	9.81333	219.657	150	0	0	0	0.408333	0.585	0.175	10.0667	26.0167	1.79	1.90333	0.0966667	1.99833	7.2	3.80667	2.74333
Wood Buffalo	2016-06-03	10	-109.606	55.7756	14.1733	211.29	86.6667	0	0	0	0.0116667	0.591667	0.105	9.83333	32.2	1.74167	1.87833	0.08	1.94667	5.76667	2.72	1.82667
Beacon Hill	2016-06-04	8	-111.363	56.6943	11.8817	256.303	178.333	0	0	0.216667	1.04667	0.97	1.495	9.06667	42.5167	3.36333	1.9	0.0333333	1.93833	12.6	3.49	2.055
Abasand	2016-06-07	10	-111.375	56.7103	10.25	244.672	218.333	6.13333	0	0.35	0	1.485	0	6.68333	53.6333	1.805	1.9	0.0866667	1.97	20.6667	5.705	3.09
Abasand	2016-06-07	11	-111.375	56.7103	10.4483	250.12	471.667	1.28333	0	0.0166667	0.89	1.215	1.61	5.75	49.05	2.005	1.90333	0.09	1.98	14.2	4.15333	2.47333
Abasand	2016-06-07	12	-111.375	56.7103	17.5533	309.877	91.6667	10.0333	0	0.3	0.025	2.72333	0.52	5.73333	48.1667	2.29167	1.9	0.13	2.05333	34.8167	8.27167	4.195
Waterways	2016-06-07	14	-111.338	56.6985	16.3333	296.522	146.667	1.95	0	0.0333333	0.118333	2.17333	0.641667	6.36667	49.0333	6.36167	1.90167	0.0916667	1.99167	19.45	4.69333	3.21667
Waterways	2016-06-07	15	-111.339	56.6985	16.595	305.122	96.6667	2.26667	0.1	0.2	0.751667	2.27167	1.78833	6.76667	44.9	4.09167	1.9	0.095	1.99667	14.4167	5.19333	3.22167
Waterways	2016-06-07	16	-111.338	56.6985	12.29	293.5	136.667	0.45	0.15	0.116667	1.20833	1.62333	1.83167	5.8	42.1167	11.5867	1.87	0.0933333	1.96333	16.9167	4.45833	2.62833
Beacon Hill	2016-06-08	7	-111.362	56.6927	7.30333	310.747	1085	3.53333	0.45	1.16667	0.0433333	13.2683	11.22	10.7	22.2833	0.688333	2.16333	0.295	2.41167	71.4833	20.0667	12.3517
Beacon Hill	2016-06-08	8	-111.362	56.6927	7.48833	311.268	1033.33	2.4	0	0.85	0	13.9417	11.0383	9.65	23.7167	4.61333	2.11	0.281667	2.4	73.9667	19.2633	10.6183
Beacon Hill	2016-06-08	9	-111.362	56.6927	7.805	312.69	891.667	2.5	0	0.95	0	12.025	9.31	8.95	29.0667	4.06	2.18167	0.288333	2.43	64.0833	18.1217	10.2817
Beacon Hill	2016-06-08	10	-111.362	56.6926	8.15833	310.463	798.333	2.88333	0.0333333	0.866667	0	12.0217	9.73333	8.8	30.4	2.94833	2.16	0.291667	2.41833	89.9	18.97	9.22667
Beacon Hill	2016-06-08	11	-111.362	56.6926	7.92333	302.107	655	1.83333	0.0333333	0.35	0.0716667	10.2167	6.95667	7.5	33.5333	2.58833	2.04333	0.213333	2.26	129	19.4867	7.33833
Beacon Hill	2016-06-08	12	-111.362	56.6927	8.32833	301.583	503.333	1.13333	0.1	0.1	0.0283333	8.32333	5.91	7.73333	37.4833	2.72667	2	0.196667	2.18333	150.667	19.1833	6.74167
Beacon Hill	2016-06-08	13	-111.362	56.6927	8.41	309.965	443.333	0.0166667	0	0	0.0166667	4.38167	0.768333	6.06667	42.3167	2.28	1.90833	0.09	1.99833	64.6667	9.165	4.22833
Beacon Hill	2016-06-08	14	-111.362	56.6927	8.68	229.875	361.667	0	0.0166667	0	0.208333	4.48167	1.065	5.85	41.85	2.91667	1.90333	0.07	1.97167	81.1	12.2433	5.89167
FMM Airport	2016-06-09	12	-111.233	56.6562	5.17167	106.655	103.333	0	0	0	0.208333	0.385	0.275	4.4	34.4833	1.78	1.9	0.08	1.94167	2.23333	1.73833	0.886667
FMM Airport	2016-06-09	13	-111.233	56.6562	4.8	10.84	105	0	0.0333333	0	0.01	0.316667	0.0233333	4.05	32.7333	2.55333	1.9	0.0783333	1.95	1.36667	1.155	0.566667
FMM First Nations	2016-06-09	7	-111.173	56.4416	16.875	42.6667	170	0	0.0333333	0.35	0.0116667	0.34	0.00833333	10.1	16.55	0.263333	1.9	0.0833333	1.96333	4.8	3.86	2.675
FMM First Nations	2016-06-09	8	-111.173	56.4416	18.29	24.2867	90	0	0	0	0.0216667	0.266667	0.015	7.86667	17.3833	1.65667	1.9	0.0816667	1.96667	2.53333	2.07167	1.26667
FMM First Nations	2016-06-09	9	-111.173	56.4416	13.4383	40.9183	198.333	0	0	0	0.0416667	0.276667	0.0183333	6.46667	18.65	1.61333	1.9	0.085	1.965	1.88333	1.56333	0.888333
FMM First Nations	2016-06-09	10	-111.173	56.4416	10.1117	79.9533	116.667	0	0	0	0	0.295	0.00166667	5.35	27.15	1.75833	1.9	0.0866667	1.96833	1.43333	1.25833	0.738333
