# Supplementary material for: Satellite-derived emissions of carbon monoxide, ammonia, and nitrogen dioxide from the 2016 Horse River wildfire in the Fort McMurray area
Source: Copernicus journal article supplement (doi:10.5194/acp-2018-913), 2018-10-12
Supplement: Supplementary file [file acp-2018-913-AC1-supplement.pdf]

We thank anonymous referee #2 for their comments, which have helped to improve the manuscript. We have provided the referee comments in italics, with responses to each comment below.

*1. Page 5, Line 6-14: Please clarify the necessity and effect of increasing sampling. For example, would the number of available data be substantially reduced if the data affected by row anomaly were not included? Would the uncertainties of NO<sub>x</sub> emission estimates in Table 1 be significantly stronger due to the reduced sampling?*

In total, there were nine days with enough OMI VCDs to estimate emissions. On five of these days (May 2, 5, 14, 16, 23), the OMI measurements over and downwind of the fire hot spots were not affected by the row anomaly. On four of these days (May 6, 13, 15, 24), the row anomaly affected more than half of the measurements over and downwind of the fire hot spots.

In order to test the effect of reduced sampling, the VCDs on May 5, which were not affected by the row anomaly, were filtered to remove VCDs in a pattern similar to the row anomaly. With full sampling, emissions estimates were 1 kt/d. With the reduced sampling, emissions estimates decreased to 0.4 kt/d. This demonstrates that inclusion of the row anomaly data was important to have sufficient sampling on the four days affected by the row anomaly.

In order to reflect this, we've added the following to Sect. 2.3

*"Inclusion of the row anomaly data was required to have sufficient sampling to estimate emissions for 6 May, 13 May, 15 May, and 24 May. The row anomaly did not affect VCDs over the fire hot spots for other days."*

*2. Section 4: Apart from all the uncertainty tests, I am surprised that the authors did not do sensitivity calculations that account for the uncertainties in the satellite retrievals?*

We have added uncertainty terms for the satellite retrievals, as recommended. These are given in Sect. 4.7 and are included in Table 1.

*3. Section 4.1: Maybe the authors could list some uncertainties for NH<sub>3</sub> and NO<sub>x</sub> in this section assuming the default lifetime they used later, just to provide a perspective if it could actually be larger or smaller than the 48% determined from CO?*

The difficulty with running these tests for NH<sub>3</sub> and NO<sub>x</sub> is that the alternative method tested, 20-km downwind flux, is not very good for short-lived species and yields large differences from the emissions estimate method given in the paper. This is because for typical winds at the plume altitudes ~20 km/h, VCDs 20 km downwind have aged by 1-hour, which is approaching the lifetime of NO<sub>x</sub> and is ~1/3 the lifetime of NH<sub>3</sub> for this fire. Therefore, the downwind measurements are taken at much lower levels of NO<sub>x</sub> and NH<sub>3</sub> and are sensitive to the choice in lifetime. Therefore, we applied the test for CO only and used the same value for NH<sub>3</sub> and NO<sub>x</sub>. We have changed the wording in the text to better-reflect this reasoning: "The value of 48.8% method uncertainty was used for both NH<sub>3</sub> and NO<sub>x</sub> because the alternate method used in the sensitivity tests is based on downwind flux, where NH<sub>3</sub> and NO<sub>x</sub> line

densities are smaller due to their short life-times. Therefore, the alternate method is very sensitive to the assumed lifetimes and is therefore not appropriate for these species.”

*4. Section 4.2: There is generally 1 or less than 1 piece of information in the NH<sub>3</sub> retrieval from CrIS, and the average kernels of CrIS suggest the retrievals are most sensitive to 800-900 hpa (Shepard and Cady-Pereira, 2015). It is not surprising to me if CrIS resolves the variation of NH<sub>3</sub> that are more reflective of winds at such altitude. Using MISR and CALIPSO plume height data is a good idea since the multi-angle capability of MISR and the LIDAR signals in CALIPSO do contain vertical information. I suggest the authors to reconsider (or further justify) the value of CrIS NH<sub>3</sub> in determining the plume shape.*

The total column averaging kernels for CrIS are shown in the response to referee #1, and has values close to 1 up to ~3 km. Therefore, CrIS is sensitive to NH<sub>3</sub> at 700 hPa, and Fig. 2 therefore suggests that there is not much NH<sub>3</sub> at this altitude (~2.6 km) compared with the lower altitudes. CrIS averaging kernels show no sensitivity above 3 km, which is expected if there is little or no NH<sub>3</sub> at these altitudes.

*5. Page 12, Line 22-23: I am interested in the proportion of "accepted fitting", which gives a sense of the applicability of this fitting method in the data investigated. Also, for the cases with larger fitting errors, where are the errors from?*

The proportion of accepted fitting is given in Table 1 below. The fits were performed using data from the fire hotspots to 200 km downwind of the fires. Therefore, for a good fit, the winds must be fairly consistent over a large area. For ammonia, the primary reason for poor fits was low wind-speeds and variable wind directions downwind of the fires, which led, for example, to the accumulation of ammonia at some locations far downwind. Other poor fits occurred when there were gaps in the data far downwind, which led to poor interpolation at these locations. For NO<sub>2</sub>, no fits failed the fitting error criterion. This is likely because, due to the short lifetime, there is very little NO<sub>2</sub> far downwind and therefore the fit is not as sensitive to inconsistencies in the winds.

This demonstrates that this fitting method to estimate lifetime is applicable only on days with winds that are consistent downwind of the fire. Therefore, in this paper, we did not use a daily fitted lifetime for each satellite instrument. Instead we used the fitted lifetimes with successful fits to get a best estimate of lifetime for ammonia and NO<sub>2</sub> and used other values in the literature to estimate uncertainties in the lifetime. Note that, unlike the lifetime calculations, the emissions estimates are not sensitive to variable wind conditions or data gaps far downwind because they only includes data over and 20 km downwind of the fire hotspots.

We have added the following to Sect. 4.3 to describe this:

“Approximately 60% of ammonia fits with sufficiently large plumes did not meet the fitting error criteria; this occurred primarily when wind speeds were low and/or winds were variable downwind, and therefore the plume changed direction and/or accumulated over some downwind locations. All NO<sub>2</sub> fits met the fitting criteria, as the short lifetime of NO<sub>2</sub> makes it less sensitive to inconsistencies in the winds far downwind.”

Table 1: Number of days included in lifetime estimates.

|                              | # days with emissions estimates | # days with emissions estimates > thresholds (1 kt/d for NH <sub>3</sub> , 0.5 kt/d for NO <sub>2</sub> ) | # days with emissions estimates > thresholds & fitting error < 1 h |
|------------------------------|---------------------------------|-----------------------------------------------------------------------------------------------------------|--------------------------------------------------------------------|
| CrIS NH <sub>3</sub>         | 12                              | 10                                                                                                        | 6                                                                  |
| IASI-A Day NH <sub>3</sub>   | 10                              | 7                                                                                                         | 3                                                                  |
| IASI-B Day NH <sub>3</sub>   | 10                              | 6                                                                                                         | 2                                                                  |
| IASI-A Night NH <sub>3</sub> | 8                               | 5                                                                                                         | 2                                                                  |
| IASI-B Night NH <sub>3</sub> | 6                               | 4                                                                                                         | 1                                                                  |
| OMI NO <sub>2</sub>          | 9                               | 6                                                                                                         | 6                                                                  |

6. Page 16, Line 32-33: *Instead of just omitting the MODIS data, could the authors comment on if the emission/FRP relationship might become non-linear at very strong burning conditions, and a good fit could still be achieved by deleting the two peaking records of FRP in Figure 8? The derived emission factors could still be meaningful, representing constant burning conditions.*

As suggested, we tried removing the two days with peaks in FRP (May 16 and 24) and the correlation improved significantly, so that it was better than the correlation with GFAS assimilated FRP. Therefore, we elected to replace GFAS FRP with MODIS FRP in the paper and revised Sect. 5.3, Table 3, and Fig. 10 accordingly.

7. Figure 10: *I am interested to see if the correlation would be better or worse if the diurnal variation (e.g. in Figure 7) were corrected?*

In order to test this, we scaled the emissions estimates to a 24-h mean value for the scatter plot against GFAS FRP (Fig. 7 in the discussions paper). The satellite does not measure exactly at the time of the emission – instead it measures VCDs, some of which are right over the fire hot spots (very recently emitted) and some of which are downwind. In order to account for this, the time of emission was using the average age of the air within the box (clearing time divided by 2). The corrections for diurnal variation did not improve correlation with FRP. For IASI CO, R=0.48 without corrections and R=0.42 with corrections. For IASI NH<sub>3</sub>, R=0.46 without corrections and R=0.48 with corrections. This is not surprising since the FireWork diurnal variation is based on a simple scaling of the data according to time of day and is not calculated specifically for this fire. Furthermore, many other factors affect the emissions estimates, such as the assumed life-time and the plume height, all of which could blur the effect of the diurnal variation on the relationship to FRP.

8. *Since the authors made great efforts in quantifying and analyzing the uncertainties which are insightful enough to be part of the main findings in the paper, I suggest adding a related discussion in the*

*abstract and the conclusion. An example could be "The uncertainties of emission estimates are more sensitive to the plume shape for CO, and to the fitted lifetime for NH<sub>3</sub> and NO<sub>x</sub>".*

We have added the following to the abstract: "Sensitivity tests were performed and it was found that uncertainties of emission estimates are more sensitive to the plume shape for CO, and to the fitted lifetime for NH<sub>3</sub> and NO<sub>x</sub>."

*Technical suggestions:*

*1. Page 1, Line 30: "0.03" should be "0.003"?*

This has been corrected

*2. Page 2, Line 21-22: Maybe change to "more than 10% of global CO emissions from wildfires are over mid- and high- latitude."*

This has been changed as recommended

*3. Page 8, Line 27-28: Please clarify how to determine if one day is with "sufficient" data, and how the "gap filling" was done?*

We have added the following about determining if there is sufficient data:

"This was done by visually inspecting the original and gridded VCDs for each day; if gaps in the data covered large areas that were required to resolve the plume or led to interpolation of the plume that looked suspect, the day's data was excluded. Most of the days excluded were missing more than half of the data over or downwind of the fire hot spots."

And the following about gap filling:

"... using interpolation with the inpaint\_nans function in MATLAB (D'Errico, 2009)."

*4. Page 9, Line 15: I suppose the "VCD" here should actually be "dVCD"?*

Yes, this has been changed to dVCD

*5. Page 12, Line 17: Again, how to define "sufficient"?*

This was addressed above

*6. Page 16, Line 2 and Page 17, Line 3: Should add a reference to this estimation method.*

A reference has been added

*7. Page 17, Line 7: Should add "for NO<sub>x</sub>" somewhere in this line to guide the presentation in the rest of this paragraph.*

"for NO<sub>x</sub>" has been added to clarify this
